# Supplementary material
Source: PubMed Central journal article supplement (PMC4018869)
Supplement: AEM.00128-14_zam999105386so1.pdf [file AEM.00128-14_zam999105386so1.pdf]

0.0010

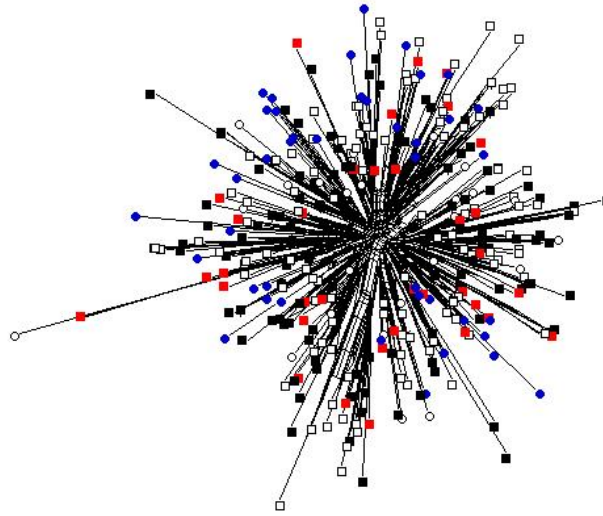

1

2

Fig. S1: Split networks analysis of *Burkholderia pseudomallei* isolates using SplitsTree.

3

Black squares represent the Darwin region, white squares represent the Remote Top End,

4

red squares represent East Arnhem and blue circles represent Queensland. White circles

5

represent shared STs between the Darwin region and the Remote Top End.

6

7

8
